# Supplementary material for: The mosquitoes of Armenia: review of knowledge and results of a field survey with first report of Aedes albopictus
Source: PubMed Central journal article supplement (PMC7278218; doi:10.1051/parasite/2020039), 2020-06-08
Supplement: parasite-27-42-s2.pdf [file parasite-27-42-s2.pdf]

**Supplementary file.** Paronyan et al (2020) The mosquitoes of Armenia: review of knowledge and results of a field survey with first report of *Aedes albopictus*. Parasite.

Table S5: Mosquito species recorded in Armenia and in the surrounding countries. A number between brackets indicates record and refers to the bibliographic list below the table.

|                                | Armenia  | Georgia | Azerbaijan<br>(including<br>Nakhitchevan) | Iran (only the 3<br>Provinces of north-<br>western Iran:<br>Ardebil, East<br>Azerbaijan and West<br>Azerbaijan) | Turkey (Anatolia<br>only) |
|--------------------------------|----------|---------|-------------------------------------------|-----------------------------------------------------------------------------------------------------------------|---------------------------|
| <i>Ae. (Stg.) aegypti</i>      |          | [1]     |                                           |                                                                                                                 | [1]                       |
| <i>Ae. (Stg.) albopictus</i>   | [herein] | [1]     |                                           |                                                                                                                 | [1]                       |
| <i>Ae. (Och.) annulipes</i>    | [herein] |         |                                           |                                                                                                                 | [1]                       |
| <i>Ae. (Och.) caspius</i>      | [herein] | [1]     | [1]                                       | [2,3,4,5]                                                                                                       | [1]                       |
| <i>Ae. (Och.) cataphylla</i>   | [herein] |         | [1]                                       |                                                                                                                 | [1]                       |
| <i>Ae. (Aed.) cinereus</i>     | [herein] | [1]     |                                           |                                                                                                                 | [1]                       |
| <i>Ae. (Och.) communis</i>     |          |         |                                           |                                                                                                                 | [1]                       |
| <i>Ae. (Stg.) cretinus</i>     |          | [1]     |                                           |                                                                                                                 | [1]                       |
| <i>Ae. (Och.) cyprius</i>      |          |         |                                           |                                                                                                                 | [1]                       |
| <i>Ae. (Och.) detritus</i>     |          |         |                                           |                                                                                                                 | [1]                       |
| <i>Ae. (Och.) dorsalis</i>     | [herein] |         |                                           |                                                                                                                 | [1]                       |
| <i>Ae. (Dah.) echinus</i>      |          |         |                                           |                                                                                                                 | [1]                       |
| <i>Ae. (Och.) excrucians</i>   |          | [1]     |                                           |                                                                                                                 | [1]                       |
| <i>Ae. (Och.) flavescens</i>   | [herein] |         |                                           | [5]                                                                                                             | [1]                       |
| <i>Ae. (Dah.) geniculatus</i>  | [herein] | [1]     | [1]                                       | [2,4]                                                                                                           | [1]                       |
| <i>Ae. (Och.) intrudens</i>    |          | [1]     |                                           |                                                                                                                 |                           |
| <i>Ae. (Rus.) lepidonotus</i>  |          |         |                                           |                                                                                                                 | [1]                       |
| <i>Ae. (Och.) leucomelas</i>   |          |         |                                           |                                                                                                                 | [1]                       |
| <i>Ae. (Acy.) phoeniciae</i>   |          |         |                                           |                                                                                                                 | [1]                       |
| <i>Ae. (Och.) nigrocanus</i>   |          |         |                                           |                                                                                                                 | [1]                       |
| <i>Ae. (Och.) pulcritarsis</i> |          | [1]     | [1]                                       |                                                                                                                 | [1]                       |
| <i>Ae. (Och.) pullatus</i>     |          |         |                                           |                                                                                                                 | [1]                       |
| <i>Ae. (Och.) punctor</i>      |          | [1]     |                                           |                                                                                                                 | [1]                       |
| <i>Ae. (Rus.) refiki</i>       |          |         |                                           |                                                                                                                 | [1]                       |
| <i>Ae. (Rus.) rusticus</i>     |          |         |                                           |                                                                                                                 | [1]                       |
| <i>Ae. (Och.) sticticus</i>    |          | [1]     |                                           |                                                                                                                 |                           |
| <i>Ae. (Och.) surcoufi</i>     |          |         | [1]                                       |                                                                                                                 |                           |
| <i>Ae. versicolor</i>          |          |         | [1]                                       |                                                                                                                 |                           |
| <i>Ae. (Adm.) vexans</i>       | [herein] | [1]     | [1]                                       | [3,4,5]                                                                                                         | [1]                       |
| <i>Ae. (Acy.) zammitii</i>     |          |         |                                           |                                                                                                                 | [1]                       |
| <i>An. (Ano.) algeriensis</i>  |          | [1]     |                                           |                                                                                                                 | [1]                       |
| <i>An. (Cel.) cinereus</i>     |          |         |                                           |                                                                                                                 | [1]                       |
| <i>An. (Ano.) claviger</i>     | [herein] | [1]     | [1]                                       | [2,3,4,5]                                                                                                       | [1]                       |

|                                     |          |     |     |           |     |
|-------------------------------------|----------|-----|-----|-----------|-----|
| <i>An. (Ano.) hyrcanus</i>          | [herein] | [1] | [1] | [3,4,5,6] | [1] |
| <i>An. (Ano.) maculipennis s.s.</i> | [herein] | [1] | [1] | [4,6]     | [1] |
| <i>An. (Ano.) melanoon</i>          |          | [1] | [1] |           | [1] |
| <i>An. (Ano.) messeae</i>           |          |     |     |           | [1] |
| <i>An. (Ano.) persiensis</i>        |          |     | [1] |           |     |
| <i>An. (Ano.) marteri</i>           |          |     |     |           | [1] |
| <i>An. (Ano.) plumbeus</i>          | [herein] | [1] | [1] |           | [1] |
| <i>An. (Ano.) pseudopictus</i>      |          |     |     | [3,4]     |     |
| <i>An. (Cel.) pulcherimus</i>       |          |     |     | [2]       | [1] |
| <i>An. (Ano.) sacharovi</i>         | [herein] | [1] | [1] | [3,4,6]   | [1] |
| <i>An. (Cel.) superpictus</i>       | [herein] | [1] | [1] | [3,4,7]   | [1] |
| <i>Cq. (Coq.) buxtoni</i>           |          |     |     |           | [1] |
| <i>Cq. (Coq.) richiardii</i>        | [herein] |     | [1] | [3,4]     | [1] |
| <i>Cs. (Cus.) alaskaensis</i>       |          | [1] |     |           | [1] |
| <i>Cs. (Cus.) annulata</i>          | [herein] | [1] | [1] | [4]       | [1] |
| <i>Cs. (Cus.) fumipennis</i>        |          | [1] | [1] |           | [1] |
| <i>Cs. (All.) longiareolata</i>     | [herein] | [1] | [1] | [2,3,4,5] | [1] |
| <i>Cs. (Cus.) morsitans</i>         |          | [1] | [1] |           | [1] |
| <i>Cs. (Cus.) subochrea</i>         | [herein] |     | [1] | [3,4]     | [1] |
| <i>Cx. (Mai.) deserticola</i>       |          |     |     |           | [1] |
| <i>Cx. (Mai.) hortensis</i>         | [herein] | [1] | [1] | [2,4,5]   | [1] |
| <i>Cx. (Ncx.) impudicus</i>         |          |     |     |           | [1] |
| <i>Cx. (Cux.) laticinctus</i>       |          |     | [1] |           | [1] |
| <i>Cx. (Ncx.) martinii</i>          | [herein] |     |     |           | [1] |
| <i>Cx. (Cux.) mimeticus</i>         | [herein] | [1] | [1] | [2,5]     | [1] |
| <i>Cx. (Bar.) modestus</i>          | [herein] | [1] | [1] | [2,4,5]   | [1] |
| <i>Cx. (Cux.) perexiguus</i>        |          |     |     | [5]       | [1] |
| <i>Cx. (Cux.) pipiens</i>           | [herein] | [1] | [1] | [2,3,4,5] | [1] |
| <i>Cx. (Bar.) pusillus</i>          |          |     |     |           | [1] |
| <i>Cx. (Ncx.) territans</i>         | [herein] | [1] | [1] |           | [1] |
| <i>Cx. (Cux.) theileri</i>          | [herein] | [1] | [1] | [2,3,4,5] | [1] |
| <i>Cx. (Cux.) torrentium</i>        | [herein] |     |     | [4]       | [1] |
| <i>Cx. (Cux.) tritaeniorhynchus</i> |          | [1] | [1] | [3,4,5]   | [1] |
| <i>Or. pulcripalpis</i>             |          |     | [1] |           | [1] |
| <i>Ur. (Pfc.) unguiculata</i>       | [herein] | [1] | [1] | [2,3,4]   | [1] |
| Total species                       | 28       | 33  | 31  | 24        | 62  |

## References for ~~the~~ Table S5

1. Robert V, Günay F, Le Goff G, Boussès P, Sulesco T, Khalin A, Medlock J, Kampen H, Petrić D, Schaffner F. 2019. Distribution chart for Euro-Mediterranean mosquitoes (western Palaearctic region). Journal of the European Mosquito Control Association, 37, 1-28.
2. Khoshdel-Nezamiha F, Vatandoost H, Azari-Hamidian S, Bavani MM, Dabiri F, Entezar-Mahdi R, Chavshin AR. 2014. Fauna and larval habitats of mosquitoes (Diptera: Culicidae) of West Azerbaijan Province, Northwestern Iran. Journal of Arthropod-Borne Diseases, 8(2), 163-173.

3. Abai MR, Azari-Hamidian S, Ladonni H, Hakimi M, Mashhadi-Esmail K, Sheikhzadeh K, Kousha A, Vatandoost H. 2007. Fauna and checklist of mosquitoes (Diptera: Culicidae) of East Azerbaijan Province, Northwestern Iran. *Iranian Journal of Arthropod-Borne Diseases*, 1(2), 27-33
4. Azari-Hamidian S, Yaghoobi-Ershadi MR, Javadian E, Abai MR, Mobedi I, Linton YM. 2009. Distribution and ecology of mosquitoes in a focus of dirofilariasis in northwestern Iran, with the first finding of filarial larvae in naturally infected local mosquitoes. *Medical and Veterinary Entomology*, 23, 111-121.
5. Moradi-Asl E, Hazrati S, Vatandoost H, Emdadi D, Ghorbani E, Ghasemian A, Rafiee M, Panahi A, Shokri A. 2018. Fauna and larval habitat characteristics of mosquitoes (Diptera: Culicidae) in Ardabil Province, northwestern Iran. *Journal of Health*, 9(3), 259-266. [in Iranian]
6. Oshagi MA, Vatandoost H, Gorouhi A, Abai MR, Madjidpour A, Arshi S, Sadeghi H, Nazari M, Mehravaran A. 2011. Anopheline species composition in borderline of Iran-Azerbaijan. *Acta Tropica*, 119, 44-49.
7. Oshagi MA, Shemshad Kh, Yaghoobi-Ershadi MR, Pedram M, Vatandoost H, Abaie MR, Akbarzadeh K, Mohtarami F. 2007. Genetic structure of the malaria vector *Anopheles superpictus* in Iran using mitochondrial cytochrome (COI and COII) and morphologic markers: A new species complex? *Acta Tropica*, 101, 241-248.
